# Supplementary material for: Polyhydroxyalkanoates-Based Nanoparticles as Essential Oil Carriers
Source: MDPI journal article supplement (doi:10.3390/polym14010166), 2022-01-01
Supplement: s1 [file s1]

## Supplementary materials

### Polyhydroxyalkanoates-based nanoparticles as essential oil carriers

Iolanda Corrado <sup>1</sup>, Rocco Di Girolamo <sup>1</sup>, Carlos Regalado González <sup>2</sup> and Cinzia Pezzella <sup>3,\*</sup>

<sup>1</sup> Department of Chemical Sciences, University of Naples Federico II, Via Cinthia, 4 -80126 Napoli, Italy; iolanda.corrado@unina.it (I.C.); rocco.digirolamo@unina.it (R.DG)

<sup>2</sup> Facultad de Química, Departamento de Investigación y Posgrado en Alimentos, Universidad Autónoma de Querétaro, Querétaro 76010, Mexico; regcarlos@gmail.com

<sup>3</sup> Department of Agricultural Sciences, University of Naples Federico II, Via Università, 100 80055 Portici (NA), Italy; cpezzella@unina.it

\* Correspondence: cpezzella@unina.it ;

**Figure S1** Size distribution by Intensity of PHB based NPs (Sample S3).

**Figure S2** Size distribution by Intensity of PHB based NPs (Sample S10).

**Figure S3** X-ray powder diffraction profiles of the neat PHB (A) and neat PHB-HHx (B).

**Figure S4** DSC thermograms, acquired at 10°C/min, of the neat PHB (A) and neat PHB-HHx (B).

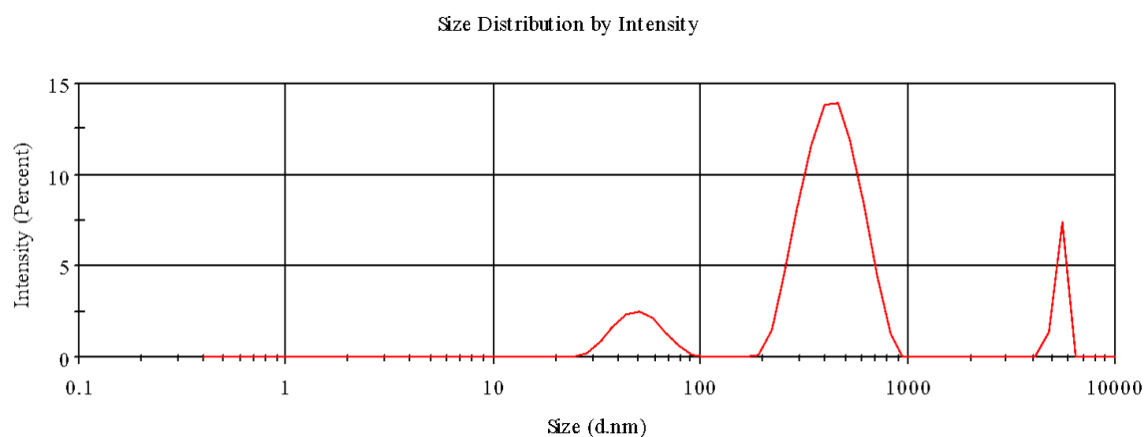

**Figure S1.** Size distribution by Intensity of PHB based NPs (Sample S3).

The graph results from Z-seizer analysis of sample S3, reporting the size distribution as a plot of the % intensity of light scattered by particles versus various size classes expressed in nm (scale is logarithmically spaced).

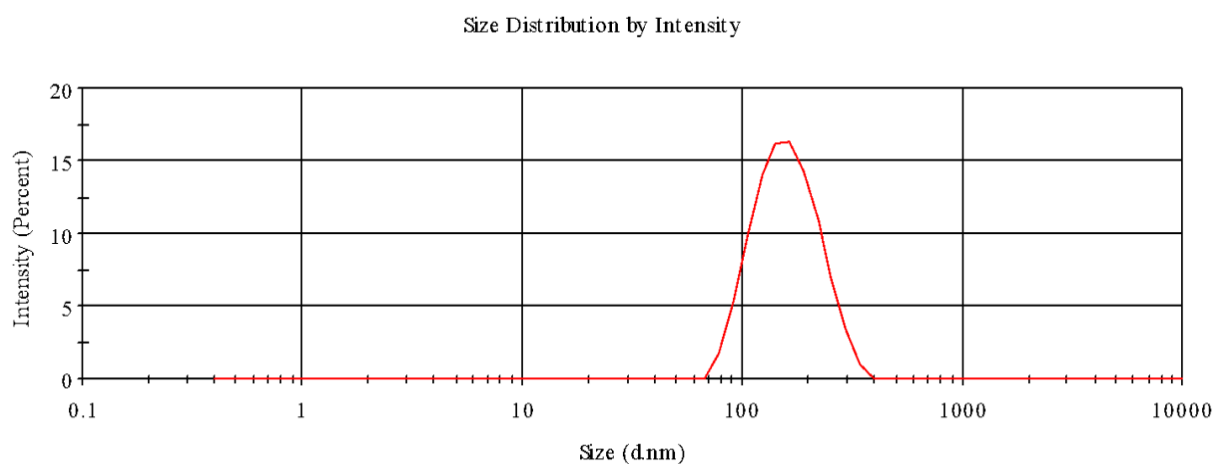

**Figure S2.** Size distribution by Intensity of PHB based NPs (Sample S10).

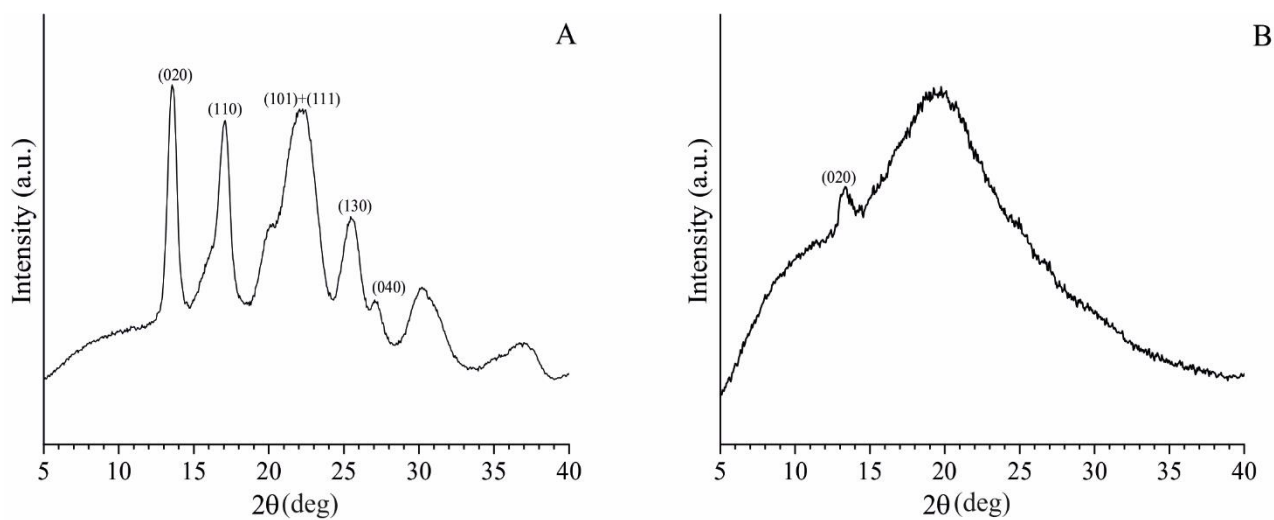

**Figure S3.** X-ray powder diffraction profiles of the neat PHB (A) and neat PHB-HHx (B).

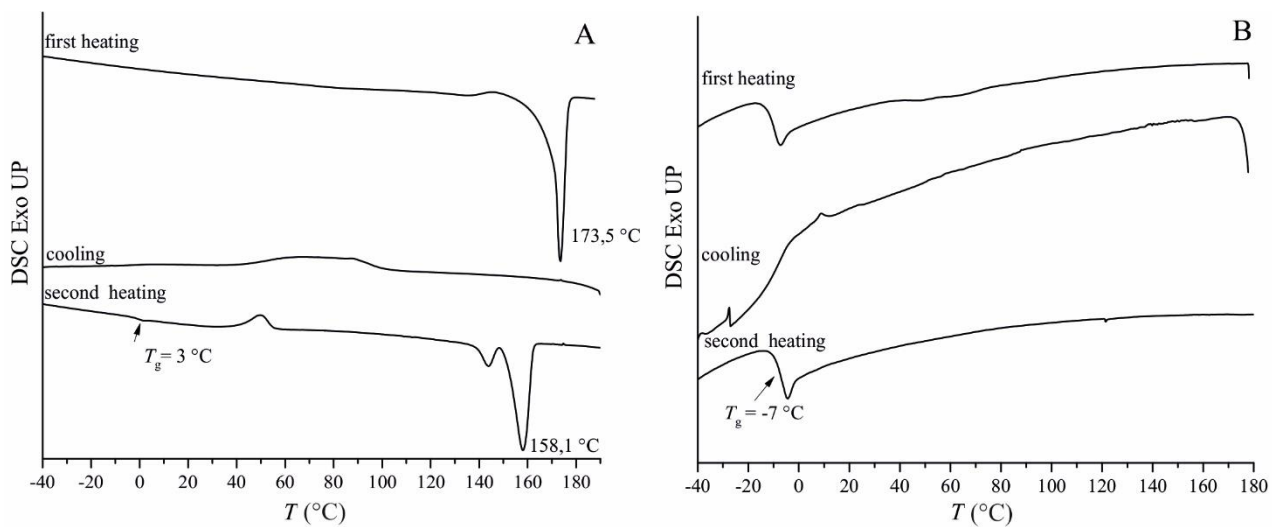

**Figure S4.** DSC thermograms, acquired at 10°C/min, of the neat PHB (A) and neat PHB-HHx (B).
